# Supplementary material for: Electrochemically synthesized SnO2 with tunable oxygen vacancies for efficient electrocatalytic nitrogen fixation
Source: Royal Society of Chemistry journal article supplement (doi:10.1039/d1nr04621g), 2021-01-01
Supplement: d1nr04621g1.pdf [file d1nr04621g1.pdf]

**Electrochemically synthesized SnO<sub>2</sub> with tuned oxygen vacancy for efficient electrocatalytic nitrogen fixation**

Xiaojia He,<sup>1</sup> Haoran Guo,<sup>2</sup> Tianhao Liao,<sup>1</sup> Yi Pu,<sup>1</sup> Long Lai,<sup>1</sup> Zihao Wang,<sup>1</sup> Hui Tang<sup>\*1</sup>

1 School of Materials and Energy, University of Electronic Science and Technology of China.  
Chengdu, 611731, China

2 School of Chemical Sciences, University of Chinese Academy of Sciences, 19 Yuquan Road,  
Shijingshan District, Beijing, 100049, PR China

\* Corresponding author: Hui Tang Email: tanghui@uestc.edu.cn

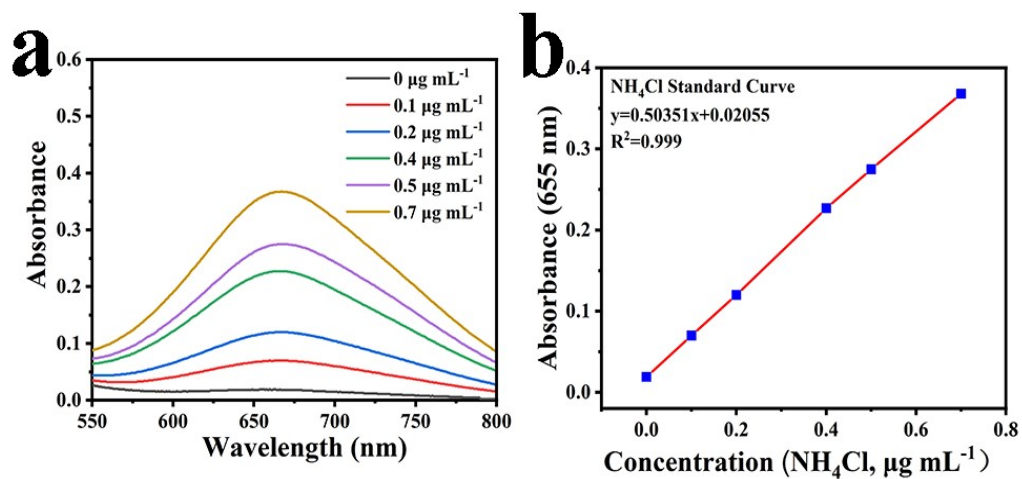

Fig. S1. (a) UV-Vis absorption spectra of indophenol assays with different  $\text{NH}_4\text{Cl}$  concentrations after incubated for 2 h in the dark. (b) Calibration curve used for calculation of  $\text{NH}_3$  concentrations by  $\text{NH}_4\text{Cl}$ .

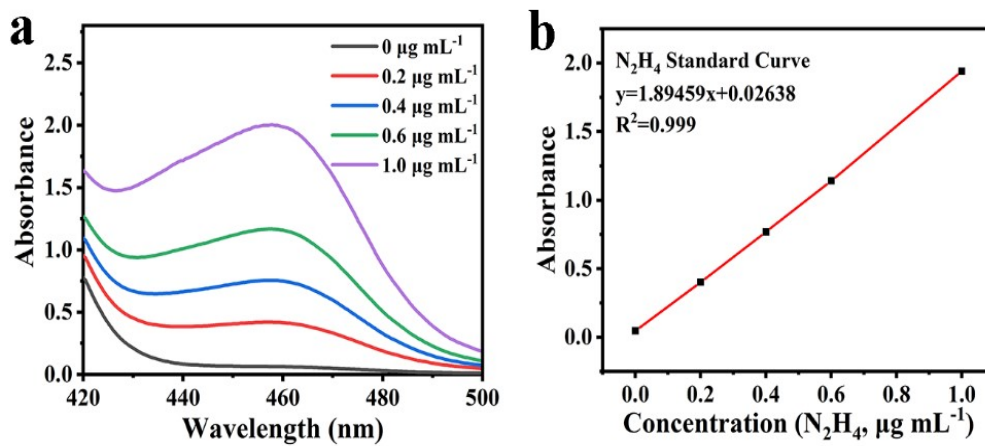

Fig. S2. (a) UV-Vis absorption spectra of various  $N_2H_4$  concentrations after adding into chemical indicator for 20 min in the dark. (b) Calibration curve used for calculation of  $N_2H_4$  concentrations.

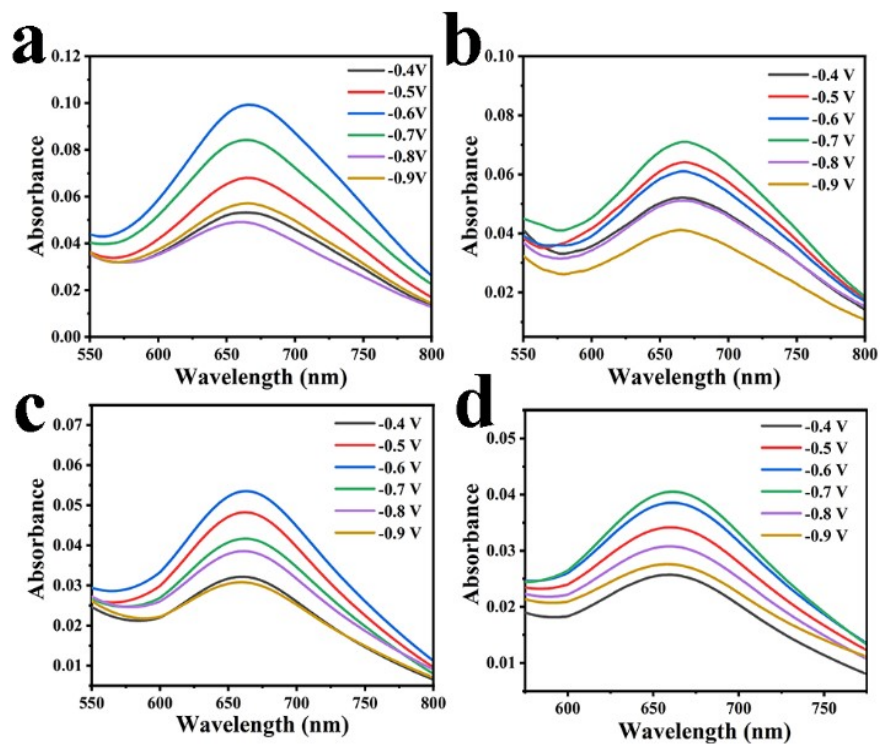

Fig. S3. UV-vis absorption spectra of the indophenol assays of the electrolyte after 2 h electrolysis of (a)  $\text{SnO}_2(\text{V}_\text{O})_{12}$ , (b)  $\text{SnO}_2(\text{V}_\text{O})_9$ , (c)  $\text{SnO}_2(\text{V}_\text{O})_6$  and (d) commercial  $\text{SnO}_2$  at various potentials.

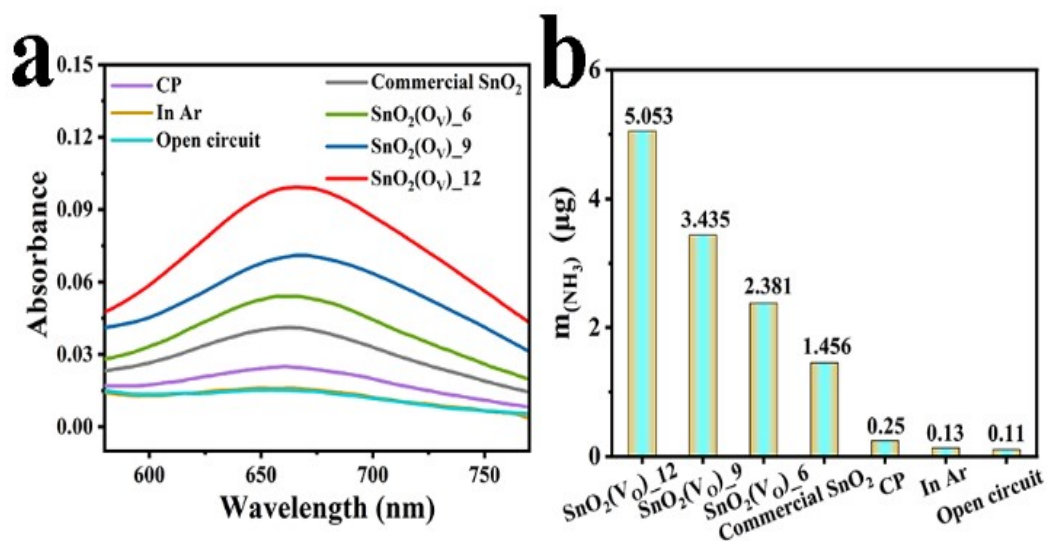

Fig.S4. (a) UV-vis absorption spectra of the indophenol assays of the electrolyte and (b) corresponding NH<sub>3</sub> yield after 2 h electrolysis at - 0.6 V of SnO<sub>2</sub> (V<sub>O</sub>)<sub>6</sub> and SnO<sub>2</sub> (V<sub>O</sub>)<sub>12</sub>, at - 0.7 V of SnO<sub>2</sub> (V<sub>O</sub>)<sub>9</sub> and commercial SnO<sub>2</sub>, at -0.6 V of SnO<sub>2</sub> (V<sub>O</sub>)<sub>12</sub> in Ar- saturated, at - 0.6 V of pure carbon paper, and of SnO<sub>2</sub> (V<sub>O</sub>)<sub>12</sub> at open circuit.

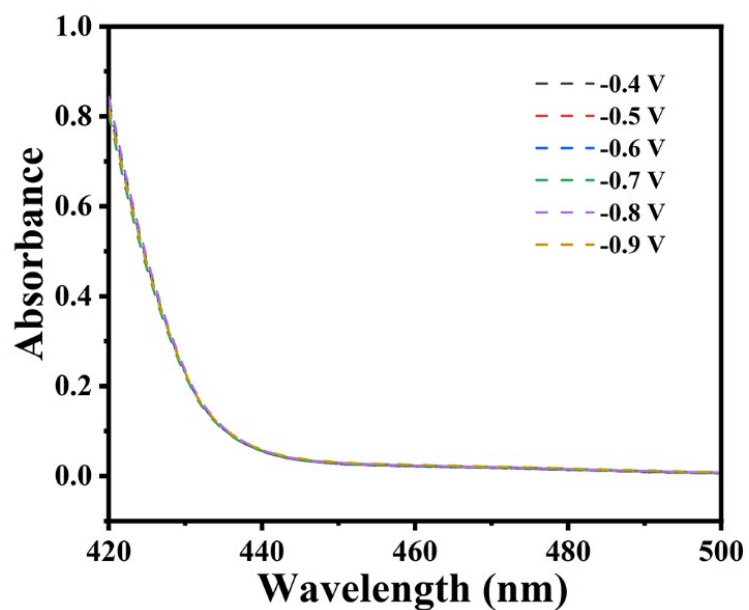

Fig.S5. UV-Vis absorption spectra of the electrolytes estimated by the method of Watt and Chrisp after electrolysis in  $N_2$ -saturated 0.1 M  $Na_2SO_4$  at various potentials for 2 h of  $SnO_2 (V_O)_{12}$  nanoparticles.

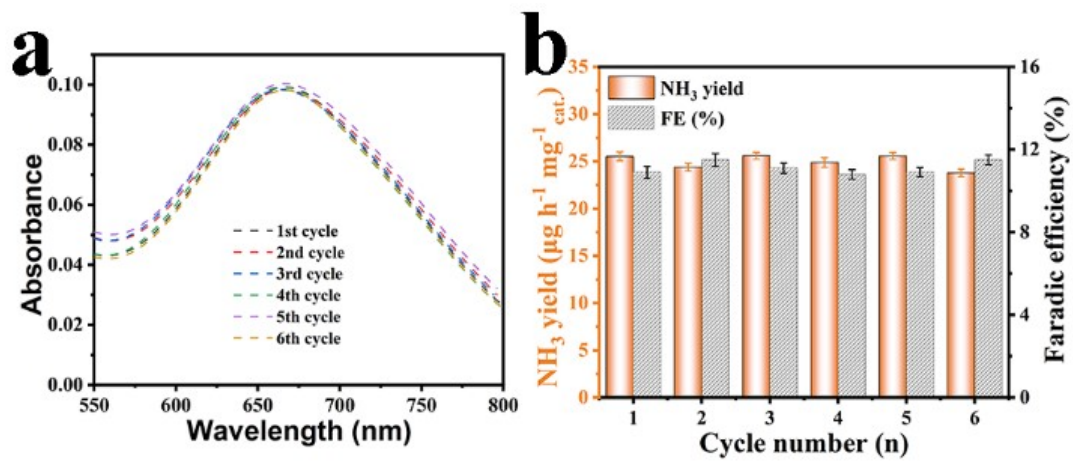

Fig.S6. (a) UV-vis absorption spectra of the indophenol assays of the electrolyte and (b) corresponding NH<sub>3</sub> yield rates and FEs after 2 h electrolysis at  $-0.6$  V of SnO<sub>2</sub> (V<sub>O</sub>)<sub>12</sub>.

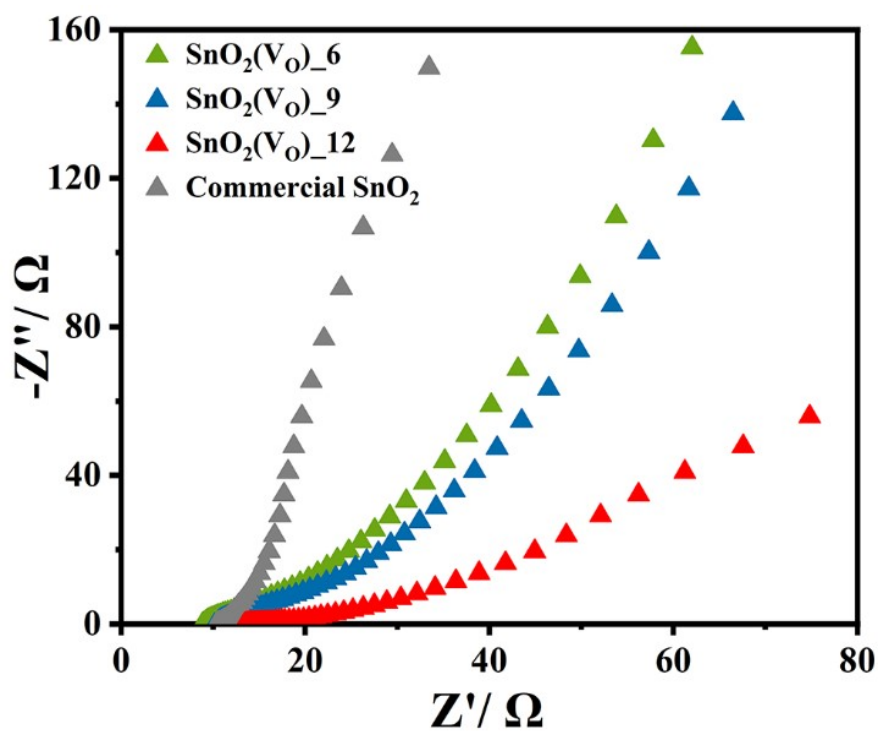

Fig.S7. The EIS plots for  $\text{SnO}_2(\text{V}_\text{O})_6$ ,  $\text{SnO}_2(\text{V}_\text{O})_9$ ,  $\text{SnO}_2(\text{V}_\text{O})_{12}$ , and commercial  $\text{SnO}_2$  in  $\text{N}_2$ -saturated electrolyte. For comparison, the  $R_\Omega$  was omitted in the Nyquist plots.



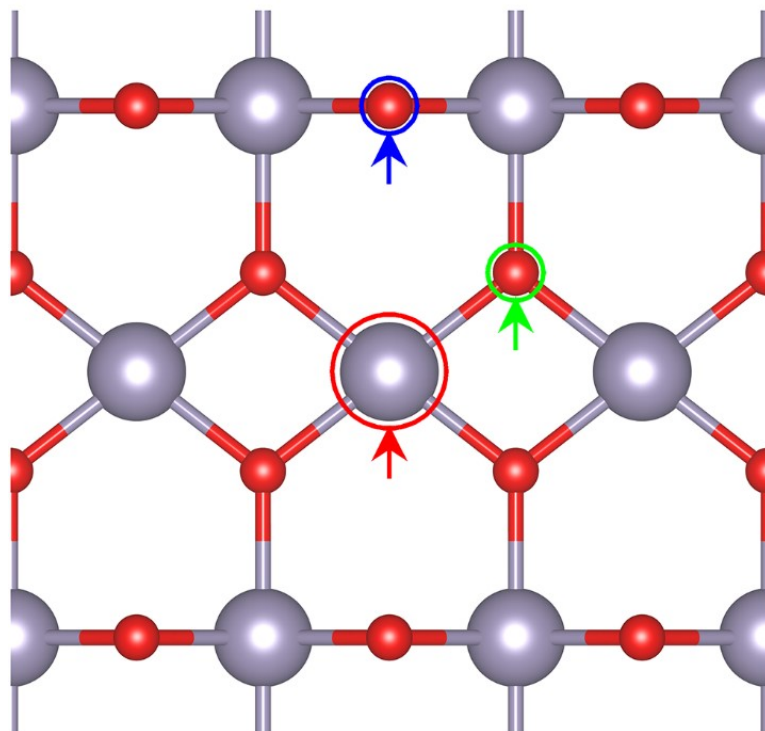

Fig. S8. Top view of SnO<sub>2</sub>(110). The active site, O<sub>side</sub> and O<sub>top</sub> are marked in red, green and blue circles.

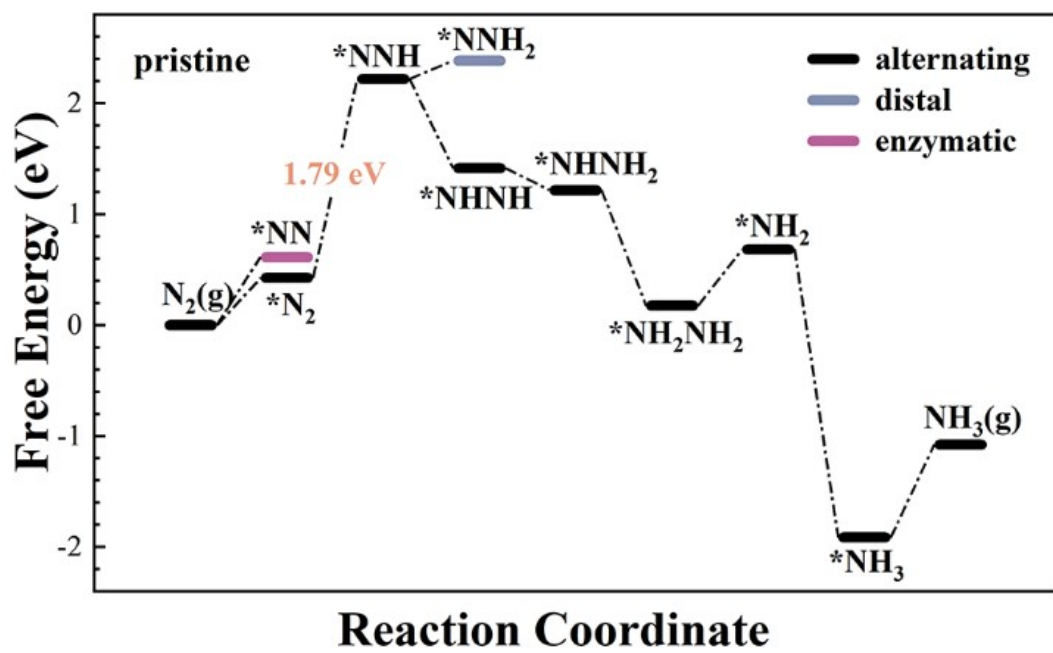

Fig. S9. Calculated free energy changes of NRR on pristine SnO<sub>2</sub>(110) surface.

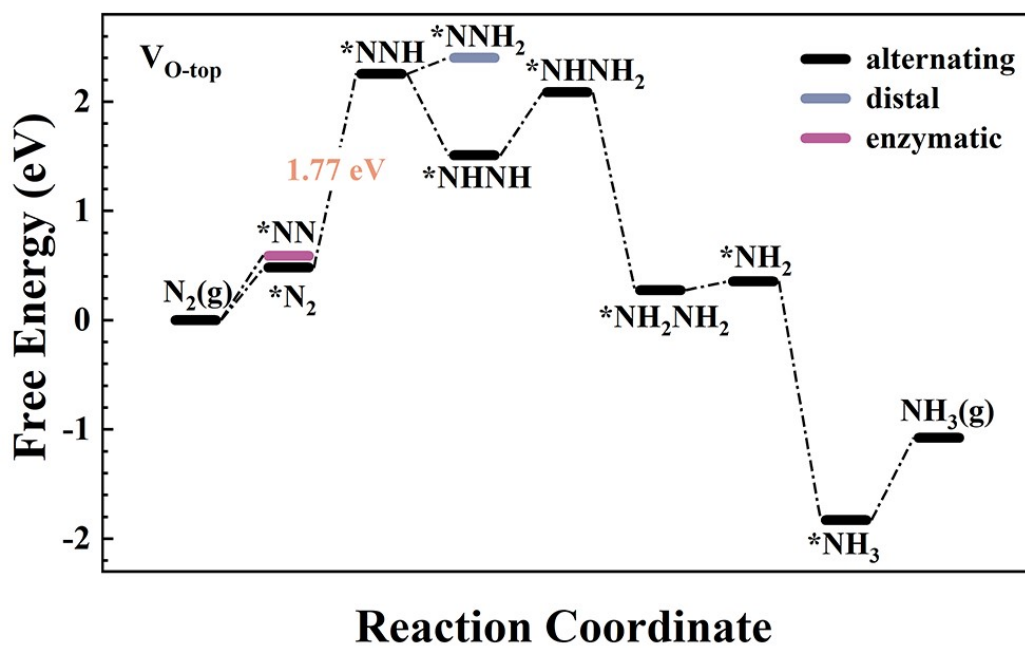

Fig. S10. Calculated free energy changes of NRR process on  $V_{O-top}$   $SnO_2(110)$  surface.

Table S1. the comparative electrocatalytic NRR performance among the SnO<sub>2</sub> (V<sub>O</sub>)<sub>-12</sub> sample and other metal oxide catalysts under ambient conditions.

| Catalyst                                           | Electrolyte                            | NH <sub>3</sub> yield rate                                    | FE %  | Ref.      |
|----------------------------------------------------|----------------------------------------|---------------------------------------------------------------|-------|-----------|
| SnO <sub>2</sub> (V <sub>O</sub> ) <sub>-12</sub>  | 0.1 M Na <sub>2</sub> SO <sub>4</sub>  | 25.27 μg h <sup>-1</sup> mg <sup>-1</sup> <sub>cat.</sub>     | 11.48 | This work |
| R-WO <sub>3</sub> NSs                              | 0.1 M HCl                              | 17.28 μg h <sup>-1</sup> mg <sup>-1</sup> <sub>cat.</sub>     | 7.0   | 1         |
| hollow Cr <sub>2</sub> O <sub>3</sub> microspheres | 0.1 M Na <sub>2</sub> SO <sub>4</sub>  | 25.3 μg h <sup>-1</sup> mg <sup>-1</sup> <sub>cat.</sub>      | 6.78  | 2         |
| Bi <sub>4</sub> O <sub>11</sub> /CeO <sub>2</sub>  | 0.1 M Na <sub>2</sub> SO <sub>4</sub>  | 23.21 μg h <sup>-1</sup> mg <sup>-1</sup> <sub>cat.</sub>     | 10.16 | 3         |
| MoO <sub>3</sub> nanosheets                        | 0.1 M HCl                              | 29.43 μg h <sup>-1</sup> mg <sup>-1</sup> <sub>cat.</sub>     | 1.9   | 4         |
| Co <sub>3</sub> O <sub>4</sub> @NCs                | 0.05 M H <sub>2</sub> SO <sub>4</sub>  | 42.58 μg h <sup>-1</sup> mg <sup>-1</sup> <sub>cat.</sub>     | 8.5   | 5         |
| Activated TiO <sub>2</sub> with tuned vacancy      | 0.1M HCl                               | 3.0 μg h <sup>-1</sup> mg <sup>-1</sup> <sub>cat.</sub>       | 6.5   | 6         |
| Nb <sub>2</sub> O <sub>5</sub> nanofiber           | 0.1M HCl                               | 43.6 μg h <sup>-1</sup> mg <sup>-1</sup> <sub>cat.</sub>      | 9.26  | 7         |
| β-Bi <sub>3</sub> O <sub>4</sub>                   | 0.01 M Na <sub>2</sub> SO <sub>4</sub> | 19.93 μg h <sup>-1</sup> mg <sup>-1</sup> <sub>cat.</sub>     | 4.3   | 8         |
| Au/TiO <sub>2</sub>                                | 0.1 M HCl                              | 21.4 μg h <sup>-1</sup> mg <sup>-1</sup> <sub>cat.</sub>      | 8.1   | 9         |
| Au@SnO <sub>2</sub>                                | 0.1 M HCl                              | 21.9 μg h <sup>-1</sup> mg <sup>-1</sup> <sub>cat.</sub>      | 15.2  | 10        |
| Fe <sub>2</sub> O <sub>3</sub> nanorod             | 0.1 M Na <sub>2</sub> SO <sub>4</sub>  | 15.9 μg h <sup>-1</sup> mg <sup>-1</sup> <sub>cat.</sub>      | 0.94  | 11        |
| Fe-SnO <sub>2</sub>                                | 0.1 M HCl                              | 82.7 μg h <sup>-1</sup> mg <sup>-1</sup> <sub>cat.</sub>      | 20.4  | 12        |
| Al-Doped Co <sub>3</sub> O <sub>4</sub>            | 0.1 M KOH                              | 6.48 × 10 <sup>-11</sup> mol s <sup>-1</sup> cm <sup>-2</sup> | 6.25  | 13        |
| Mn <sub>3</sub> O <sub>4</sub> @rGO                | 0.1 m Na <sub>2</sub> SO <sub>4</sub>  | 17.4 μg h <sup>-1</sup> mg <sup>-1</sup> <sub>cat.</sub>      | 3.52  | 14        |
| Spinel Fe <sub>3</sub> O <sub>4</sub> nanorod      | 0.1 M Na <sub>2</sub> SO <sub>4</sub>  | 5.6 × 10 <sup>-11</sup> mol s <sup>-1</sup> cm <sup>-2</sup>  | 2.6   | 15        |
| Mn <sub>3</sub> O <sub>4</sub> nanocube            | 0.1 m Na <sub>2</sub> SO <sub>4</sub>  | 11.6 μg h <sup>-1</sup> mg <sup>-1</sup> <sub>cat.</sub>      | 3.0   | 16        |

Table S2. Calculated zero-point energies and entropy of different adsorption species, where the \* denotes the adsorption site. T was set as 300K.

| <b>Adsorption Species</b>        | <b><math>E_{ZPE}</math> (eV)</b> | <b><math>T\Delta S</math> (eV)</b> |
|----------------------------------|----------------------------------|------------------------------------|
| *N <sub>2</sub>                  | 0.21                             | 0.12                               |
| *NNH                             | 0.45                             | 0.13                               |
| *NHNH                            | 0.79                             | 0.10                               |
| *NHNH <sub>2</sub>               | 1.17                             | 0.11                               |
| *NH <sub>2</sub> NH <sub>2</sub> | 1.52                             | 0.13                               |
| *NH <sub>2</sub>                 | 0.73                             | 0.06                               |
| *NH <sub>3</sub>                 | 1.01                             | 0.12                               |
| *NN                              | 0.21                             | 0.13                               |
| *NNH <sub>2</sub>                | 0.85                             | 0.10                               |

## Reference

1. W. Kong, R. Zhang, X. Zhang, L. Ji, G. Yu, T. Wang, Y. Luo, X. Shi, Y. Xu and X. Sun, *Nanoscale*, 2019, **11**, 19274-19277.
2. Y. Zhang, W. Qiu, Y. Ma, Y. Luo, Z. Tian, G. Cui, F. Xie, L. Chen, T. Li and X. Sun, *Acs Catalysis*, 2018, **8**, 8540-8544.
3. C. Lv, C. Yan, G. Chen, Y. Ding, J. Sun, Y. Zhou and G. Yu, *Angewandte Chemie-International Edition*, 2018, **57**, 6073-6076.
4. J. R. Han, X. Q. Ji, X. Ren, G. W. Cui, L. Li, F. Y. Xie, H. Wang, B. H. Li and X. P. Sun, *J. Mater. Chem. A*, 2018, **6**, 12974-12977.
5. S. Luo, X. Li, B. Zhang, Z. Luo and M. Luo, *ACS Appl. Mater. Interfaces*, 2019, **11**, 26891-26897.
6. Z. Han, C. Choi, S. Hong, T.-S. Wu, Y.-L. Soo, Y. Jung, J. Qiu and Z. Sun, *Applied Catalysis B: Environmental*, 2019, **257**, 117896.
7. J. Han, Z. Liu, Y. Ma, G. Cui, F. Xie, F. Wang, Y. Wu, S. Gao, Y. Xu and X. Sun, *Nano Energy*, 2018, **52**, 264-270.
8. B. Chang, Q. Liu, N. Chen and Y. Yang, *Chemcatchem*, 2019, **11**, 1884-1888.
9. M. M. Shi, D. Bao, B. R. Wulan, Y. H. Li, Y. F. Zhang, J. M. Yan and Q. Jiang, *Adv Mater*, 2017, **29**, 28240391.
10. P. Wang, Y. Ji, Q. Shao, Y. Li and X. Huang, *Science Bulletin*, 2020, **65**, 350-358.
11. X. Xiang, Z. Wang, X. Shi, M. Fan and X. Sun, *ChemCatChem*, 2018, **10**, 4530-4535.
12. L. Zhang, M. Cong, X. Ding, Y. Jin, F. Xu, Y. Wang, L. Chen and L. Zhang,

*Angew Chem Int Ed Engl*, 2020, **59**, 10888-10893.

13. X.-W. Lv, Y. Liu, R. Hao, W. Tian and Z.-Y. Yuan, *ACS Appl. Mater. Interfaces*, 2020, **12**, 17502-17508.
14. H. Huang, F. Gong, Y. Wang, H. Wang, X. Wu, W. Lu, R. Zhao, H. Chen, X. Shi, A. M. Asiri, T. Li, Q. Liu and X. Sun, *Nano Research*, 2019, **12**, 1093-1098.
15. Q. Liu, X. X. Zhang, B. Zhang, Y. L. Luo, G. W. Cui, F. Y. Xie and X. P. Sun, *Nanoscale*, 2018, **10**, 14386-14389.
16. X. Wu, L. Xia, Y. Wang, W. Lu, Q. Liu, X. Shi and X. Sun, *Small*, 2018, **14**, 10.1002/sml.201803111.
